# Supplementary material for: Estimating and accounting for tumor purity in the analysis of DNA methylation data from cancer studies
Source: PubMed Central journal article supplement (PMC5267453; doi:10.1186/s13059-016-1143-5), 2017-01-25
Supplement: 13059_2016_1143_MOESM3_ESM.pdf [file 13059_2016_1143_MOESM3_ESM.pdf]

**Supplemental Tables for “Estimating and accounting for tumor purity in the analysis of DNA methylation data from cancer studies”**

Xiaoqi Zheng<sup>1,§,\*</sup>, Naiqian Zhang<sup>2,§</sup>, Hua-Jun Wu<sup>3</sup> and Hao Wu<sup>4,\*</sup>

<sup>1</sup> Department of Mathematics, Shanghai Normal University. Shanghai 200234, China

<sup>2</sup> Department of Mathematics, Weifang University. Weifang, Shandong 261061, China

<sup>3</sup> Department of Biostatistics and Computational Biology, Dana-Farber Cancer Institute and Harvard School of Public Health, Boston 02215, MA, USA

<sup>4</sup> Department of Biostatistics and Bioinformatics, Rollins School of Public Health, Emory University. 1518 Clifton Road. Atlanta, Georgia 30322, USA

§ These authors contributed equally to this work.

\* To whom correspondence should be addressed. Tel: +1(404) 727-8633; Fax: (404)727-1370;

Email: [hao.wu@emory.edu](mailto:hao.wu@emory.edu) (HW) or [xqzheng@shnu.edu.cn](mailto:xqzheng@shnu.edu.cn) (XZ)

**Supplemental Table 1.** Correlation of purities with different number of iDMCs for Lung adenocarcinoma.

| # iDMCs | Hyper-iDMCs | Hypo-iDMCs | Correlation  |
|---------|-------------|------------|--------------|
| 40000   | 19541       | 20459      | -0.029561282 |
| 30000   | 14917       | 15083      | 0.075654013  |
| 20000   | 10221       | 9779       | 0.269719866  |
| 15000   | 7748        | 7252       | 0.395011163  |
| 10000   | 5272        | 4728       | 0.47442487   |
| 5000    | 2710        | 2290       | 0.633087253  |
| 3000    | 1634        | 1366       | 0.732679103  |
| 1000    | 498         | 502        | 0.737323616  |
| 500     | 232         | 268        | 0.718119456  |
| 200     | 76          | 124        | 0.735658178  |
| 100     | 33          | 67         | 0.726482289  |
| 50      | 17          | 33         | 0.689750702  |

**Supplemental Table 2.** 43 universal normal samples used for iDMC detection.

| Cancer type | Sample name                  | Cancer type | Sample name                  |
|-------------|------------------------------|-------------|------------------------------|
| BLCA        | TCGA-CU-A0YN-11A-11D-A10W-05 | LUAD        | TCGA-49-4488-11A-01D-1756-05 |
| BLCA        | TCGA-BT-A20R-11A-11D-A16P-05 | LUSC        | TCGA-18-5592-11A-11D-1633-05 |
| BRCA        | TCGA-BH-A0BM-11A-12D-A093-05 | LUSC        | TCGA-39-5019-11A-01D-1818-05 |
| BRCA        | TCGA-BH-A0DQ-11A-12D-A10Q-05 | PAAD        | TCGA-FZ-5924-11A-01D-1744-05 |
| CESC        | TCGA-MY-A5BF-11A-11D-A26S-05 | PAAD        | TCGA-H6-A45N-11A-12D-A26Q-05 |
| CESC        | TCGA-HM-A3JJ-11A-12D-A21R-05 | PCPG        | TCGA-P8-A5KC-11A-11D-A35E-05 |
| CHOL        | TCGA-W5-AA2I-11A-11D-A418-05 | PCPG        | TCGA-SQ-A6I4-11A-11D-A35J-05 |
| CHOL        | TCGA-W5-AA2U-11A-11D-A418-05 | PRAD        | TCGA-G9-6385-11A-01D-1787-05 |
| COAD        | TCGA-A6-5667-11A-01D-1721-05 | PRAD        | TCGA-G9-6353-11A-02D-1963-05 |
| COAD        | TCGA-G4-6322-11A-01D-1721-05 | SARC        | TCGA-K1-A42X-11A-11D-A24W-05 |
| ESCA        | TCGA-L5-A4OG-11A-12D-A265-05 | SARC        | TCGA-KF-A41W-11A-11D-A24W-05 |
| ESCA        | TCGA-L5-A4OM-11A-11D-A265-05 | SKCM        | TCGA-FW-A3R5-11A-11D-A23D-05 |
| GBM         | TCGA-74-6573-11A-02D-1844-05 | SKCM        | TCGA-GN-A4U8-11A-11D-A32S-05 |
| HNSC        | TCGA-CV-6938-11A-01D-1913-05 | STAD        | TCGA-BR-6452-11A-01D-1801-05 |
| HNSC        | TCGA-CV-6955-11A-01D-2014-05 | STAD        | TCGA-BR-6566-11A-01D-1801-05 |
| KIRC        | TCGA-B0-4718-11A-01D-1275-05 | THCA        | TCGA-ET-A25N-11A-01D-A16P-05 |
| KIRC        | TCGA-BP-5186-11A-01D-1424-05 | THCA        | TCGA-ET-A3DW-11A-11D-A19K-05 |
| KIRP        | TCGA-BQ-7059-11A-01D-1963-05 | THYM        | TCGA-X7-A8D6-11A-22D-A424-05 |
| KIRP        | TCGA-DZ-6135-11A-01D-1963-05 | THYM        | TCGA-X7-A8D7-11A-11D-A424-05 |
| LIHC        | TCGA-FV-A23B-11A-11D-A16X-05 | UCEC        | TCGA-AJ-A2QL-11A-11D-A18O-05 |
| LIHC        | TCGA-FV-A2QR-11A-11D-A20Z-05 | UCEC        | TCGA-AX-A05Y-11A-11D-A27Y-05 |
| LUAD        | TCGA-44-5643-11A-01D-1626-05 |             |                              |

**Supplemental Table 3.** Overlap of iDMCs and purity correlations by using rank-sum test and minfi for iDMC selections.

| Tumor type | iDMC overlap | Purity correlation |
|------------|--------------|--------------------|
| ACC        | 694          | 0.89916106         |
| BLCA       | 436          | 0.9801305          |
| BRCA       | 429          | 0.967482834        |
| CESC       | 591          | 0.8195898          |
| CHOL       | 674          | 0.994111317        |
| COAD       | 532          | 0.978500053        |
| DLBC       | 384          | 0.835985303        |
| ESCA       | 629          | 0.981438551        |
| GBM        | 613          | 0.993820524        |
| HNSC       | 419          | 0.929794601        |
| KICH       | 731          | 0.998078951        |
| KIRC       | 566          | 0.834438077        |
| KIRP       | 643          | 0.744165123        |
| LAML       | 677          | 0.632562598        |
| LGG        | 550          | 0.98353618         |
| LIHC       | 354          | 0.932238142        |
| LUAD       | 554          | 0.938765139        |
| LUSC       | 501          | 0.858121655        |
| MESO       | 749          | 0.997121086        |
| OV         | 328          | 0.99597614         |
| PAAD       | 599          | 0.992849575        |
| PCPG       | 652          | 0.996418801        |
| PRAD       | 375          | 0.642711869        |
| SARC       | 593          | 0.336364114        |
| SKCM       | 512          | 0.971472702        |
| STAD       | 644          | 0.964136807        |
| TGCT       | 362          | 0.819077631        |
| THCA       | 612          | 0.996071218        |
| THYM       | 739          | 0.984293781        |
| UCEC       | 664          | 0.99166301         |
| UCS        | 710          | 0.996487167        |
| UVM        | 702          | 0.996369881        |

**Supplemental Table 4.** 32 cancer types analyzed in this study.

| Abbr. | Cancer type                                                      |
|-------|------------------------------------------------------------------|
| ACC   | Adrenocortical carcinoma                                         |
| BLCA  | Bladder Urothelial Carcinoma                                     |
| BRCA  | Breast invasive carcinoma                                        |
| CESC  | Cervical squamous cell carcinoma and endocervical adenocarcinoma |
| CHOL  | Cholangiocarcinoma                                               |
| COAD  | Colon adenocarcinoma                                             |
| DLBC  | Lymphoid Neoplasm Diffuse Large B-cell Lymphoma                  |
| ESCA  | Esophageal carcinoma                                             |
| GBM   | Glioblastoma multiforme                                          |
| HNSC  | Head and Neck squamous cell carcinoma                            |
| KICH  | Kidney Chromophobe                                               |
| KIRC  | Kidney renal clear cell carcinoma                                |
| KIRP  | Kidney renal papillary cell carcinoma                            |
| LAML  | Acute Myeloid Leukemia                                           |
| LGG   | Brain Lower Grade Glioma                                         |
| LIHC  | Liver hepatocellular carcinoma                                   |
| LUAD  | Lung adenocarcinoma                                              |
| LUSC  | Lung squamous cell carcinoma                                     |
| MESO  | Mesothelioma                                                     |
| OV    | Ovarian serous cystadenocarcinoma                                |
| PAAD  | Pancreatic adenocarcinoma                                        |
| PCPG  | Pheochromocytoma and Paraganglioma                               |
| PRAD  | Prostate adenocarcinoma                                          |
| SARC  | Sarcoma                                                          |
| SKCM  | Skin Cutaneous Melanoma                                          |
| STAD  | Stomach adenocarcinoma                                           |
| TGCT  | Testicular Germ Cell Tumors                                      |
| THCA  | Thyroid carcinoma                                                |
| THYM  | Thymoma                                                          |
| UCEC  | Uterine Corpus Endometrial Carcinoma                             |
| UCS   | Uterine Carcinosarcoma                                           |
| UVM   | Uveal Melanoma                                                   |
